# Supplementary material
Source: MDPI journal article supplement (https://www.mdpi.com/1996-1073/16/12/4741)
Supplement: s1 [file s1]

# Determination of the electrical parameters of iodine-doped polymer solar cells at the macro- and nanoscale for indoor applications

**Marcin Palewicz<sup>1,\*</sup>, Andrzej Sikora<sup>1</sup>, Tomasz Piasecki<sup>1</sup>, Ewelina Gacka<sup>1</sup>, Paweł Nitschke<sup>2</sup>, Paweł Gnida<sup>2</sup>, Bożena Jarząbek<sup>2</sup> and Teodor Paweł Gotszalk<sup>1</sup>**

<sup>1</sup> Department of Nanometrology, Faculty of Electronics, Photonics and Microsystem, Wrocław University of Science and Technology, 50-372 Wrocław, Poland

<sup>2</sup> Centre of Polymer and Carbon Materials, Polish Academy of Sciences, 34 M. Curie-Skłodowska Str. 41-819 Zabrze, Poland

\* Correspondence: marcin.palewicz@pwr.edu.pl (M.P.)

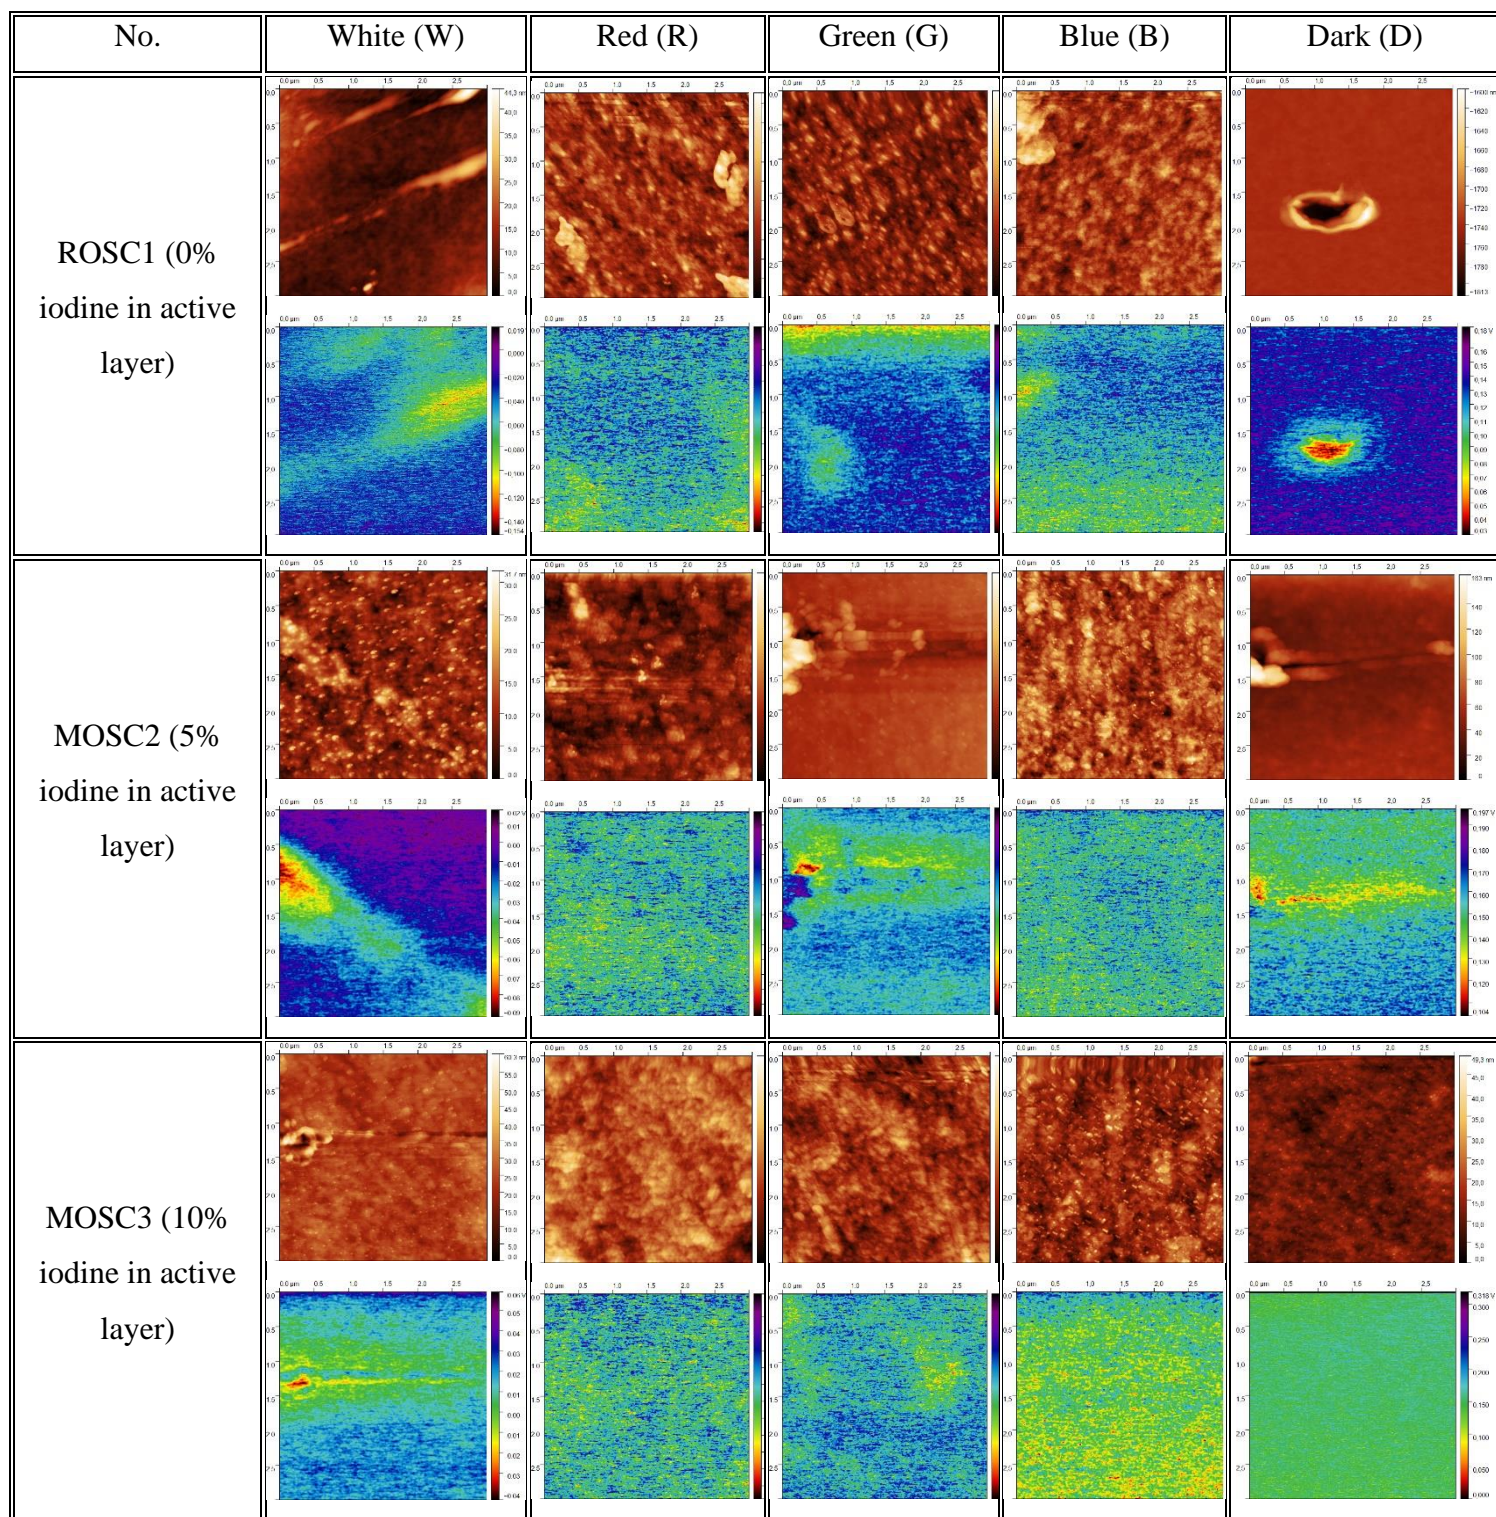

**Figure S1.** Topography (on the top, AFM) and surface potential (below, p-KPFM) of working half-cell photovoltaic devices based on an absorber P3HT:PCBM without (ROSC1) and with (MOSC2 and MOSC3) iodine doping.

The topography images (see Figure S1) were processed using following filters: tilt removal (flat surface), slow scanning axis drift removal (rows align), strokes removal. The SP images were processed with averaging filter (mean value), with window size 4x4 pixels, in order to increase image readability in terms of topography impact (features presence). In order to compare the outcome, the statistical analysis was performed. While some images contain artefacts related to the tip impact during the

approach, their presence was ignored (masked) during statistical analysis in order to avoid their impact on the obtained values and following analysis. One can see the artefacts that had to be avoided in quantitative analysis and natural features, that one should take into account, while their presence is not related to the investigation, and has an impact on the properties of materials of our interest. It has to be emphasized, that in order to be able to compare the measurement results, all the scanning parameters were maintained during the experiment. In particular, the configuration of SP detection modules was that same.

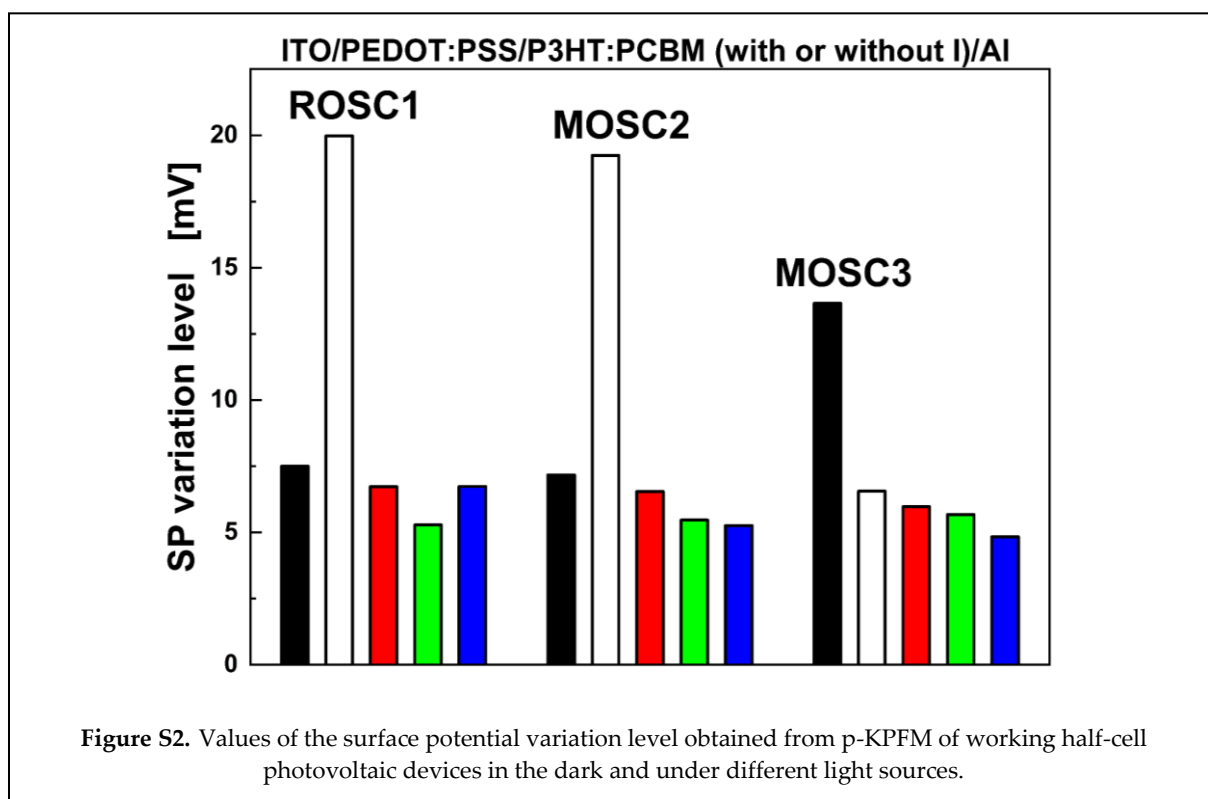

**Table S1.** Morphological properties of investigated films. Sq (root mean square deviation), Sku (kurtosis), Ssk (skewness) and Sdq (root means square gradient) parameters for the measurements for the samples ROSC1, MOSC2, MOSC3.

|                                                |       | S <sub>q</sub> | S <sub>ku</sub> | S <sub>sk</sub> | S <sub>dq</sub> |
|------------------------------------------------|-------|----------------|-----------------|-----------------|-----------------|
| Sample                                         |       | [nm]           | [nm]            | [nm]            | [nm]            |
| ROSC1<br>(0%<br>iodine in<br>active<br>layer)  | dark  | 1.374          | 0.423           | 0.092           | 0.089           |
|                                                | white | 3.171          | 3.088           | 0.142           | 0.147           |
|                                                | red   | 1.356          | 1.687           | 1.103           | 0.053           |
|                                                | blue  | 1.546          | 1.548           | 0.811           | 0.065           |
| MOSC2<br>(5%<br>iodine in<br>active<br>layer)  | green | 1.425          | 0.292           | 0.620           | 0.071           |
|                                                | dark  | 4.820          | -0.240          | -0.200          | 0.113           |
|                                                | white | 4.107          | 0.670           | 0.448           | 0.167           |
|                                                | red   | 2.544          | 1.027           | 0.724           | 0.111           |
| MOSC3<br>(10%<br>iodine in<br>active<br>layer) | blue  | 2.188          | 0.298           | 0.315           | 0.116           |
|                                                | green | 6.425          | -0.805          | 0.191           | 0.127           |
|                                                | dark  | 2.834          | 1.600           | 0.489           | 0.140           |
|                                                | white | 3.081          | 1.020           | 0.446           | 0.190           |
|                                                | red   | 2.714          | 0.523           | 0.191           | 0.084           |
|                                                | blue  | 2.817          | 0.788           | 0.535           | 0.164           |
|                                                | green | 2.299          | 0.156           | 0.311           | 0.088           |

**Table S2.** Summary of the EEC (a) modelling results for samples ROSC1, MOSC2 and MOSC3 in dark and illuminated states. Shown are:  $R_s$  – contacts and connections resistance,  $R_1$  -CPE1 – parameters of R-CPE circuit related to  $\tau_1$  – diffusion time of electrons,  $R_2$  - CPE2 – parameters of R-CPE circuit related to  $\tau_2$  – electron-hole recombination lifetime.

| Sample                                         |       | $R_s$        | $\Delta R_s$ | $R_1$         | $\Delta R_1$  | CPE1                                    |                                         |            |            | $R_2$         | $\Delta R_2$  | CPE2                                    |                                         |            |            | $\tau_1$    | $\Delta \tau_1$ | $\tau_2$    | $\Delta \tau_2$ |
|------------------------------------------------|-------|--------------|--------------|---------------|---------------|-----------------------------------------|-----------------------------------------|------------|------------|---------------|---------------|-----------------------------------------|-----------------------------------------|------------|------------|-------------|-----------------|-------------|-----------------|
|                                                |       | [ $\Omega$ ] | [ $\Omega$ ] | [k $\Omega$ ] | [k $\Omega$ ] | T                                       | $\Delta T$                              | P          | $\Delta P$ | [k $\Omega$ ] | [k $\Omega$ ] | T                                       | $\Delta T$                              | P          | $\Delta P$ | [ $\mu s$ ] | [ $\mu s$ ]     | [ $\mu s$ ] | [ $\mu s$ ]     |
|                                                |       |              |              |               |               | [sP $\Omega^{-1}$ ]<br>$\times 10^{-9}$ | [sP $\Omega^{-1}$ ]<br>$\times 10^{-9}$ | [–]<br>[–] | [–]<br>[–] |               |               | [sP $\Omega^{-1}$ ]<br>$\times 10^{-9}$ | [sP $\Omega^{-1}$ ]<br>$\times 10^{-9}$ | [–]<br>[–] | [–]<br>[–] |             |                 |             |                 |
| ROSC1<br>(0%<br>iodine in<br>active<br>layer)  | dark  | 83.02        | 0.78         | 27.38         | 3.44          | 8.88                                    | 0.84                                    | 0.9498     | 0.0030     | 142.51        | 34.94         | 10.15                                   | 1.46                                    | 0.9545     | 0.0033     | 146.98      | 13.46           | 910.63      | 152.86          |
|                                                | white | 89.38        | 2.19         | 0.78          | 0.12          | 39.06                                   | 10.00                                   | 0.8913     | 0.0212     | 16.85         | 4.70          | 81.43                                   | 5.66                                    | 0.8554     | 0.0073     | 8.15        | 1.25            | 457.71      | 161.37          |
|                                                | red   | 84.38        | 3.07         | 33.98         | 2.85          | 14.09                                   | 2.17                                    | 0.9060     | 0.0092     | 72.88         | 17.10         | 55.01                                   | 2.77                                    | 0.8956     | 0.0075     | 212.38      | 13.68           | 2090.00     | 477.42          |
|                                                | blue  | 88.06        | 2.65         | 1.33          | 0.14          | 41.30                                   | 10.40                                   | 0.8760     | 0.0216     | 21.12         | 5.17          | 86.67                                   | 6.08                                    | 0.8528     | 0.0075     | 12.99       | 0.88            | 627.93      | 202.69          |
| MOSC2<br>(5%<br>iodine in<br>active<br>layer)  | green | 86.95        | 4.32         | 6.44          | 0.96          | 24.44                                   | 5.78                                    | 0.8884     | 0.0188     | 35.53         | 4.12          | 72.52                                   | 5.90                                    | 0.8640     | 0.0051     | 49.73       | 4.82            | 1020.00     | 188.86          |
|                                                | dark  | 82.34        | 1.38         | 6.35          | 0.74          | 11.74                                   | 1.62                                    | 0.9575     | 0.0106     | 33.74         | 3.81          | 11.10                                   | 2.68                                    | 0.9287     | 0.0132     | 44.89       | 2.81            | 176.92      | 12.27           |
|                                                | white | 92.10        | 4.41         | 1.44          | 0.66          | 36.33                                   | 6.08                                    | 0.9041     | 0.0132     | 9.22          | 0.99          | 24.69                                   | 9.76                                    | 0.9269     | 0.0150     | 16.66       | 5.05            | 109.84      | 18.51           |
|                                                | red   | 93.94        | 4.54         | 9.23          | 2.41          | 11.43                                   | 1.21                                    | 0.9537     | 0.0240     | 24.55         | 7.10          | 39.57                                   | 21.23                                   | 0.8823     | 0.0348     | 65.60       | 11.40           | 334.99      | 81.97           |
| MOSC3<br>(10%<br>iodine in<br>active<br>layer) | blue  | 99.61        | 4.81         | 1.50          | 0.84          | 25.93                                   | 8.79                                    | 0.9567     | 0.0537     | 13.98         | 1.47          | 30.98                                   | 15.08                                   | 0.8931     | 0.0283     | 20.87       | 6.22            | 158.27      | 40.14           |
|                                                | green | 96.02        | 4.02         | 4.38          | 1.61          | 12.93                                   | 1.11                                    | 0.9761     | 0.0293     | 23.49         | 6.15          | 35.87                                   | 18.84                                   | 0.8750     | 0.0295     | 42.13       | 6.48            | 265.61      | 57.11           |
|                                                | dark  | 87.27        | 3.03         | 31.14         | 18.21         | 10.14                                   | 0.32                                    | 0.9419     | 0.0084     | 41.07         | 7.53          | 9.35                                    | 1.66                                    | 0.9589     | 0.0105     | 147.58      | 78.49           | 384.15      | 181.47          |
|                                                | white | 98.66        | 6.42         | 2.56          | 0.62          | 82.61                                   | 36.09                                   | 0.8150     | 0.0163     | 9.87          | 2.26          | 17.06                                   | 2.34                                    | 0.9666     | 0.0089     | 24.15       | 1.70            | 126.49      | 37.41           |
|                                                | red   | 100.52       | 10.95        | 5.33          | 0.55          | 9.63                                    | 2.06                                    | 1.0000     | 0.0000     | 45.11         | 23.32         | 29.94                                   | 3.11                                    | 0.8520     | 0.0067     | 49.75       | 6.29            | 453.61      | 283.59          |
|                                                | blue  | 103.15       | 10.45        | 4.61          | 1.07          | 61.70                                   | 28.92                                   | 0.8253     | 0.0190     | 13.87         | 4.34          | 17.51                                   | 2.10                                    | 0.9755     | 0.0131     | 38.50       | 1.27            | 196.04      | 63.50           |
|                                                | green | 100.72       | 11.45        | 5.30          | 2.09          | 18.36                                   | 9.25                                    | 0.95       | 0.05       | 32.45         | 10.16         | 22.12                                   | 2.33                                    | 0.89       | 0.03       | 48.53       | 16.32           | 340.95      | 195.01          |

The average goodness of fit measure  $\chi^2$  of fitted spectra was 3.6E-4 and it span from 6.4E-5 to 1.5E-3 for individual measurements.

$R_s$  - average series resistance related to the contacts and connections,

$R_1$  – CPE1/ $R_2$  - CPE2 – parameters of R-CPE circuit related to  $\tau_1$  – average diffusion time of electrons/ $\tau_2$  – average electron-hole recombination lifetime where:

-  $R_1/R_2$ - average resistance, CPE1/CPE2 – constant phase element,

- T and P, are average parameters of constant phase element



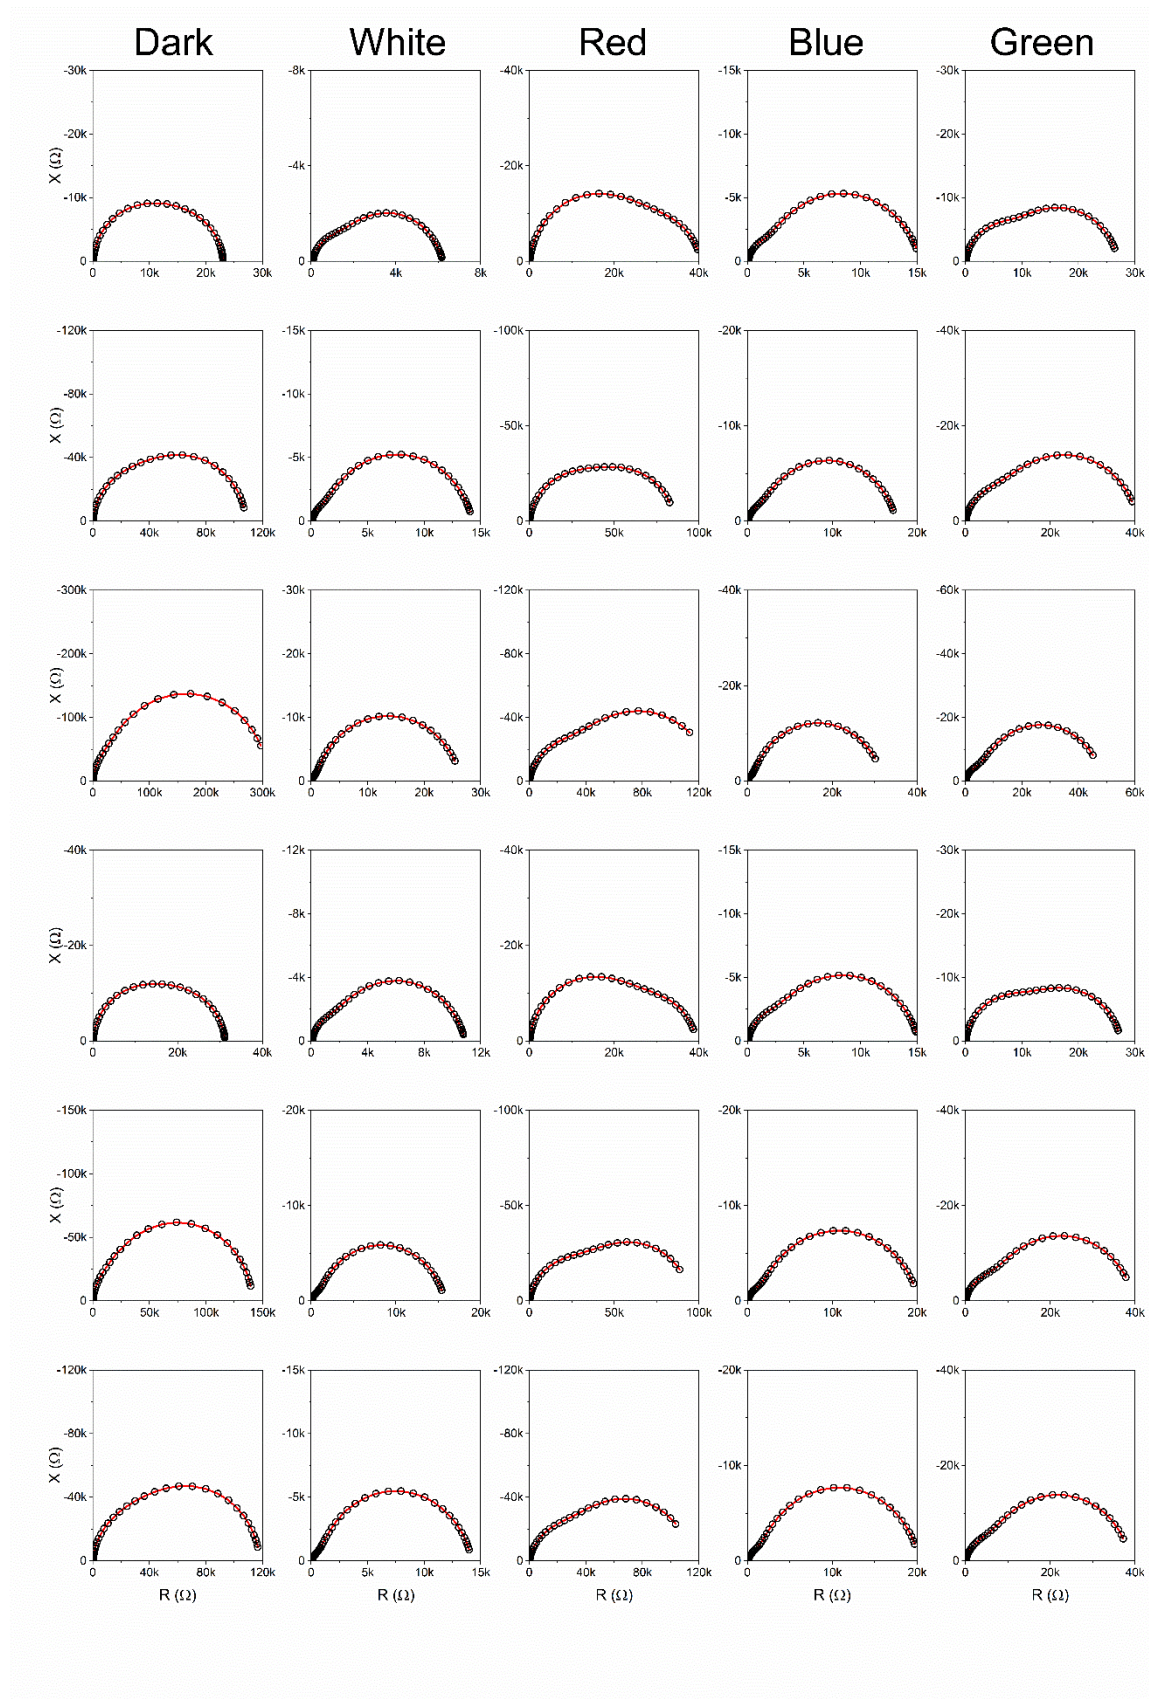

**Figure S3.** Measured (dots) and fitted (line) impedance spectra for 6 pixels (in rows) in ROSC1 sample measured in darkness and illumination.



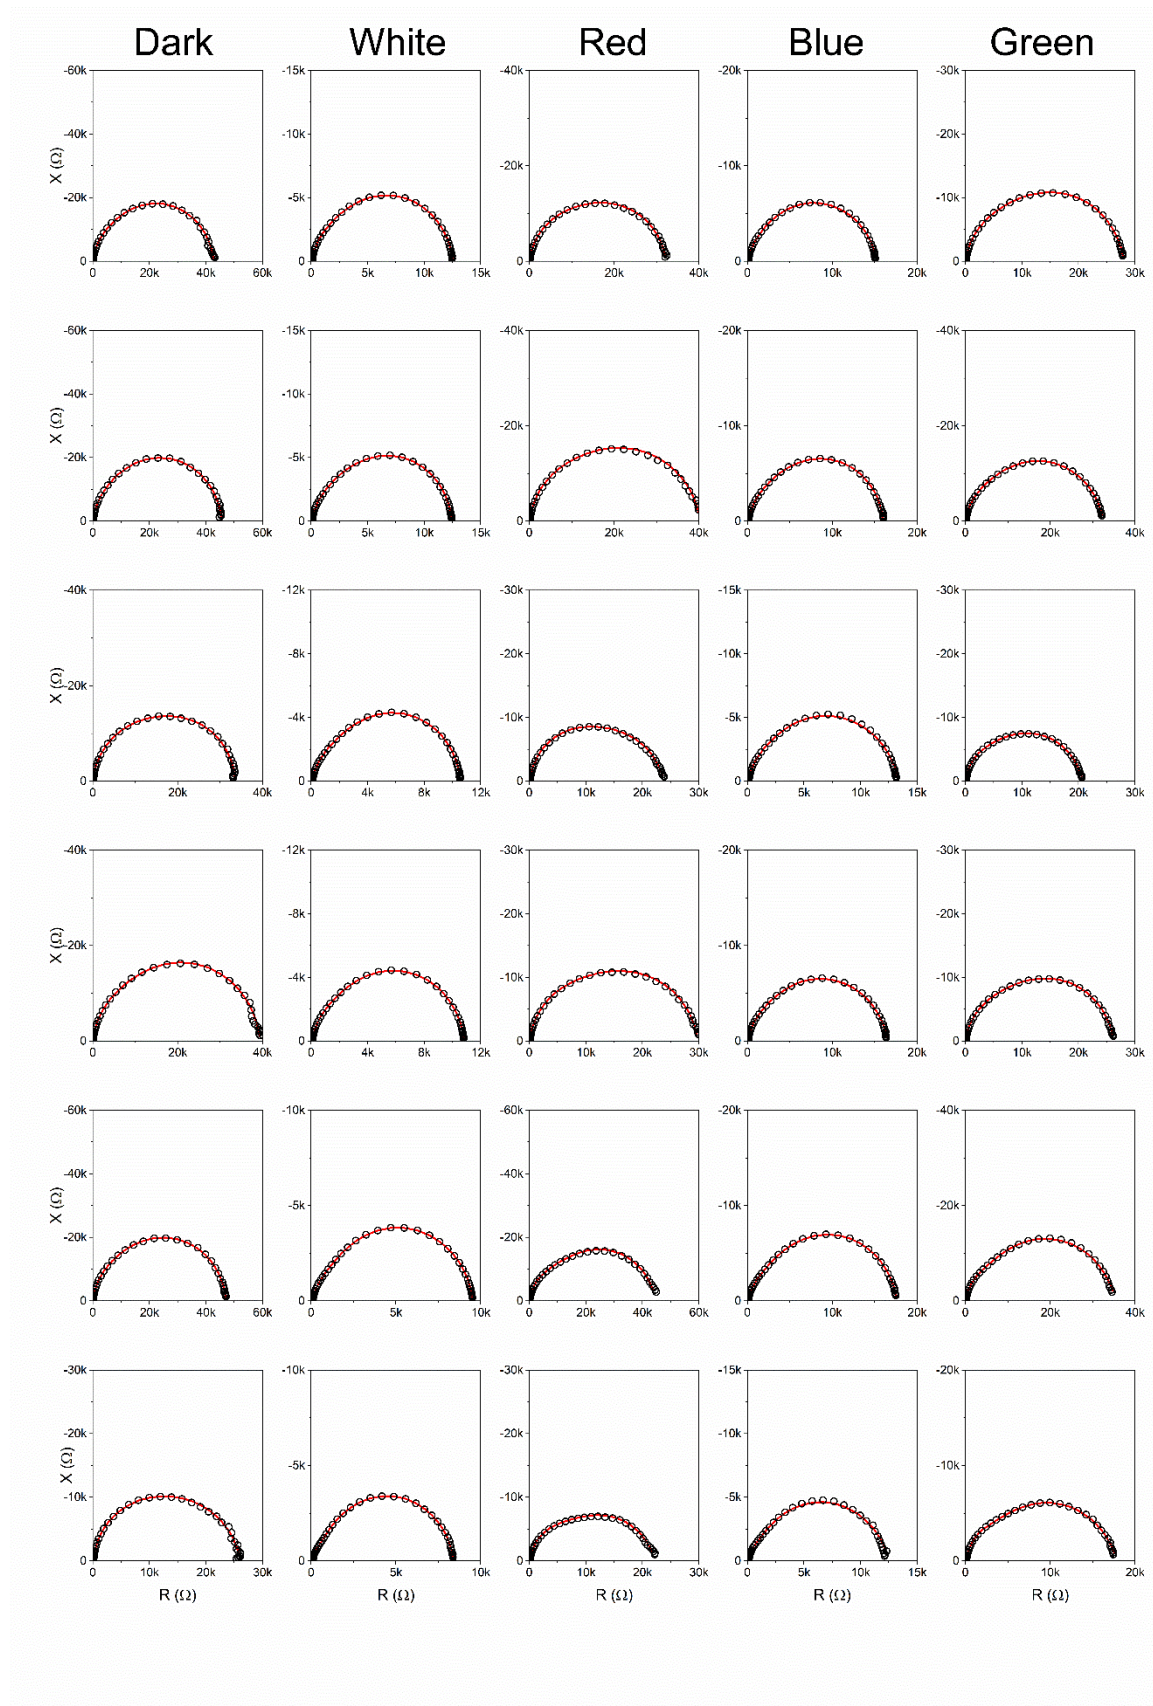

**Figure S4.** Measured (dots) and fitted (line) impedance spectra for 6 pixels (in rows) in MOSC2 sample measured in darkness and illumination.



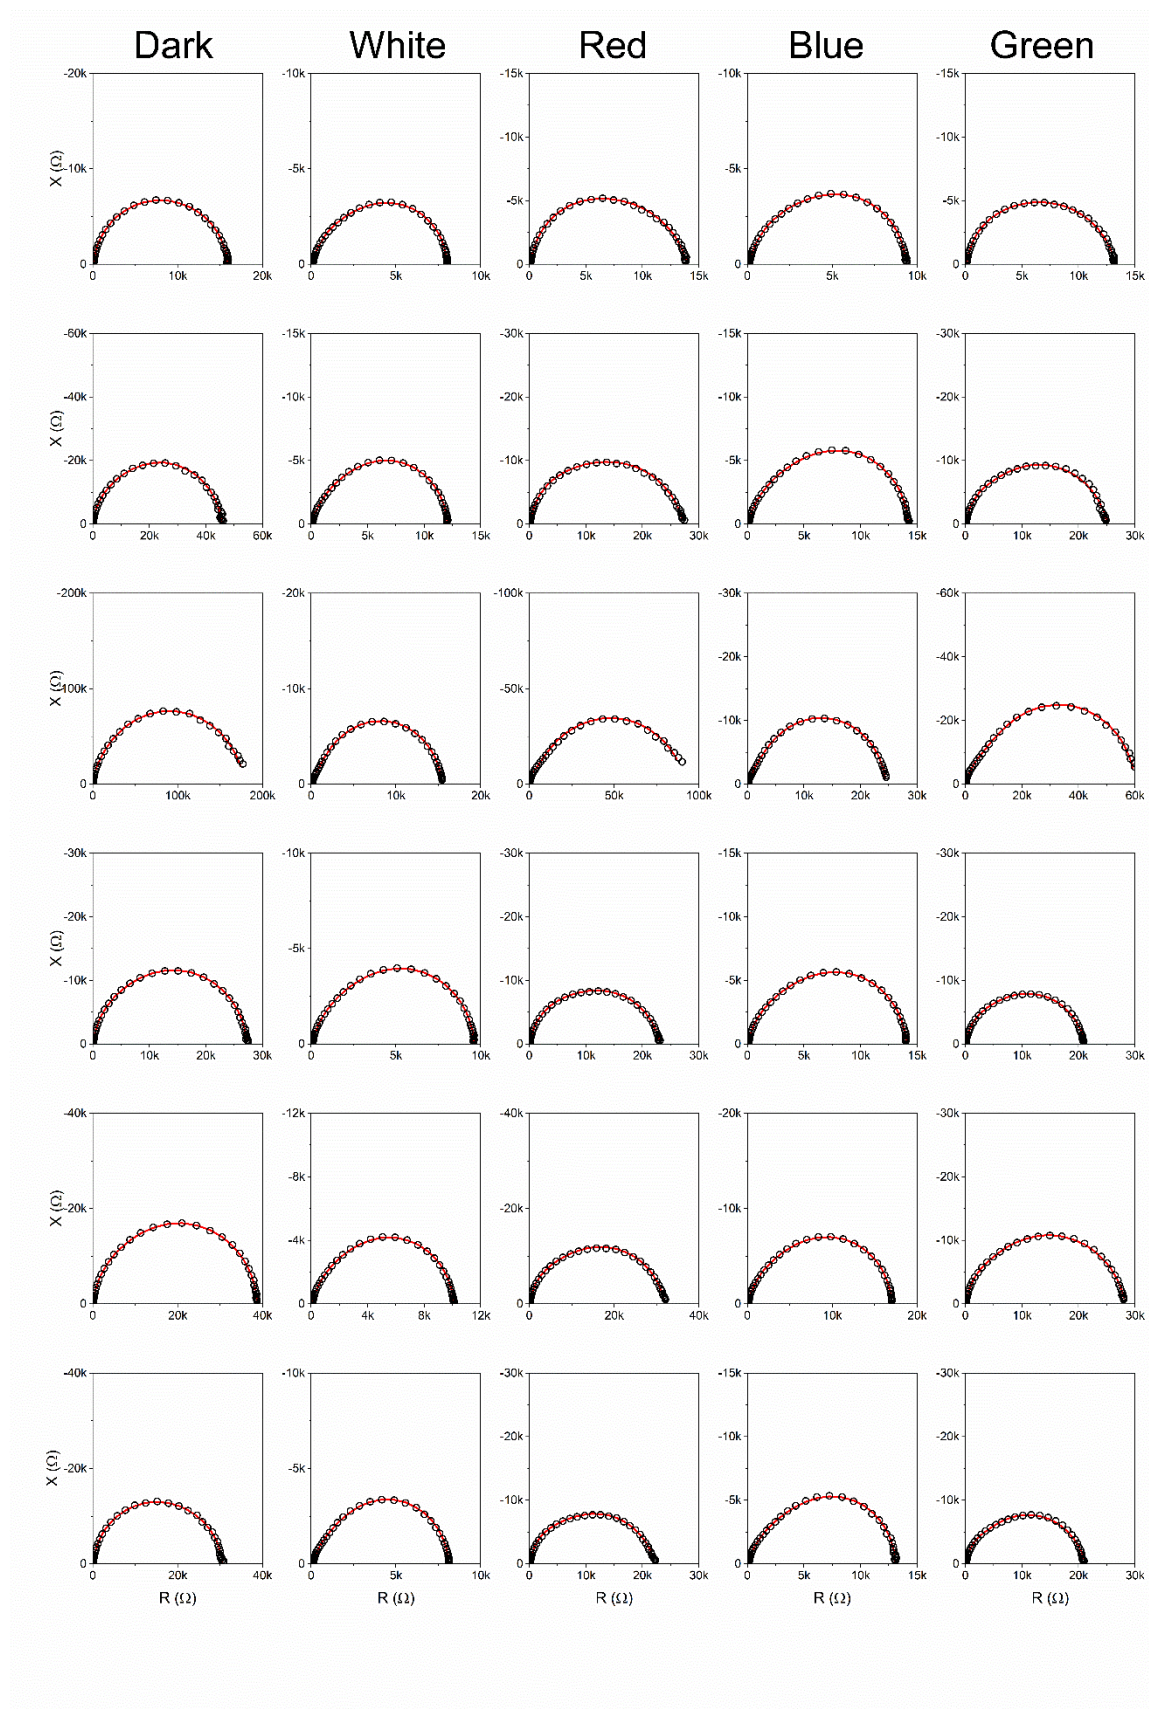

**Figure S5.** Measured (dots) and fitted (line) impedance spectra for 6 pixels (in rows) in MOSC3 sample measured in darkness and illumination.
